1 **Title:** Prevalence and population attributable fractions of potentially modifiable risk factors for  
2 dementia in Canada: a cross-sectional analysis of the Canadian Longitudinal Study on Aging

3  
4 **Authors**

5  
6 Yasaman Dolatshahi<sup>1</sup> BSc  
7 Alexandra Mayhew<sup>1,2,3</sup> PhD  
8 Megan E. O'Connell<sup>4</sup> PhD  
9 Teresa Liu-Ambrose<sup>5,6,7</sup> PT, PhD  
10 Vanessa Taler<sup>8,9</sup> PhD  
11 Eric E. Smith<sup>10</sup> MD, MPH  
12 David B. Hogan<sup>11</sup> MD  
13 Susan Kirkland<sup>12</sup> PhD  
14 Andrew P. Costa<sup>1,2</sup> PhD  
15 Christina Wolfson<sup>13,14</sup> PhD  
16 Parminder Raina<sup>1,2,15</sup> PhD  
17 Lauren Griffith<sup>1,2,15</sup> PhD  
18 Aaron Jones<sup>1,2</sup> PhD

- 19  
20 1. Department of Health Research Methods, Evidence, and Impact, McMaster University,  
21 Hamilton, ON, Canada  
22 2. McMaster Institute for Research on Aging, Hamilton, Ontario, Canada  
23 3. Labarge Centre for Mobility in Aging, Hamilton, Ontario, Canada  
24 4. Department of Psychology & Health Studies, University of Saskatchewan, Saskatchewan, SK,  
25 Canada  
26 5. Department of Physical Therapy, University of British Columbia, Vancouver, British Columbia,  
27 Canada.  
28 6. Centre for Aging SMART at Vancouver Coastal Health, Vancouver Coastal Health Research  
29 Institute, Vancouver, British Columbia, Canada  
30 7. Djavad Mowafaghian Centre for Brain Health, Vancouver Coastal Health Research Institute,  
31 British Columbia, Canada  
32 8. School of Psychology, University of Ottawa, Ottawa, Ontario, Canada  
33 9. Bruyère Research Institute, Ottawa, Ontario, Canada  
34 10. Department of Clinical Neurosciences and Hotchkiss Brain Institute, University of Calgary,  
35 Calgary, AB, Canada  
36 11. Division of Geriatric Medicine and Hotchkiss Brain Institute, Cumming School of Medicine,  
37 University of Calgary, Calgary, Alberta, Canada  
38 12. Department of Community Health & Epidemiology and Division of Geriatric Medicine, Dalhousie  
39 University, Halifax, Canada  
40 13. Department of Epidemiology, Biostatistics and Occupational Health, School of Population and  
41 Global Health & Department of Medicine, McGill University, Montreal, Canada  
42 14. Research Institute of the McGill University Health Centre, Montreal, Canada  
43 15. Labarge Centre for Mobility in Aging, Hamilton, Ontario, Canada

44  
45

46 **Corresponding Author**

47 Dr. Aaron Jones  
48 Department of Health Research Methods, Evidence, and Impact  
49 McMaster University  
50 1280 Main Street W  
51 Hamilton, ON L8S 4L8, Canada  
52 [jonesa13@mcmaster.ca](mailto:jonesa13@mcmaster.ca)

53  
54 **Word count:** 3131

55 **Tables:** 5

56 **Figures:** 1

57  
58 **Funding**

59 This study received funding from the Public Health Agency of Canada (2021-HQ-000076).

60 **Competing Interests**

61 The authors declare they have no competing interests.

62  
63  
64  
65  
66  
67  
68  
69  
70  
71  
72  
73  
74  
75  
76  
77  
78  
79  
80  
81  
82  
83  
84  
85  
86  
87  
88  
89

90 **Abstract**

91  
92 **Background:** Identification and assessment of modifiable risk factors for dementia is a public health  
93 priority in Canada and worldwide. We investigated the prevalence and population attributable fraction  
94 (PAF) of 12 potentially modifiable risk factors for all-cause dementia in middle-aged and older  
95 Canadians.

96 **Methods:** We conducted a cross-sectional study of data from the Comprehensive cohort of the  
97 Canadian Longitudinal Study on Aging, a national sample of 30,097 individuals between the ages of 45  
98 and 85 at baseline (2011-2015). Risk factors and associated relative risks were taken from a highly cited  
99 systematic review published by an international commission on dementia prevention. We estimated the  
100 prevalence of each risk factor using sampling weights to be more generalizable to the Canadian  
101 population. Individual PAFs were calculated both crudely and weighted for communality, and combined  
102 PAFs were calculated with methods reflecting both multiplicative and additive interaction assumptions.  
103 Analyses were additionally performed stratified by household income and were repeated at CSLA's first  
104 three-year follow-up (2015-2018).

105 **Results:** The most prevalent risk factors at baseline were physical inactivity (63.8%; 95% CI, 62.8% –  
106 64.9%), hypertension (32.8%; 31.7% – 33.8%), and obesity (30.8%; 29.7% – 31.8%). The highest crude  
107 PAFs were for physical inactivity (19.9%), traumatic brain injury (16.7%), and hypertension (16.6%). The  
108 highest weighted PAFs were for physical inactivity (11.6%), depression (7.7%), and hypertension (6.0%).  
109 We estimated that the 12 risk factors combined accounted for 43.4% (37.3%-49.0%) of dementia cases  
110 assuming weighted multiplicative interactions and 60.9% (55.7%-65.5%) assuming additive interactions.  
111 There was a clear gradient of increasing prevalence and PAF with decreasing income for 9 of the 12 risk  
112 factors.

113 **Interpretation:** The findings of this study can inform individual and population-level dementia  
114 prevention strategies in Canada, focusing efforts on risk factors with the largest impact on the number

115 of dementia cases. Differences in the impact of individual risk factors between this study and other  
116 international and regional studies highlight the importance of tailoring national dementia strategies to  
117 the local distribution of risk factors.

118

119

## 120 **Introduction**

121 Dementia is a clinical syndrome marked by typically progressive cognitive decline, affecting memory,  
122 perceptual-motor skills, language, mood, behaviour, and the ability to perform activities of daily living<sup>1-  
123 3</sup>. In Canada, the number of people living with dementia was estimated to be 597,000 in 2020 and is  
124 expected to increase to 1.7 million by 2050<sup>4,5</sup>. The increase in the number of individuals living with  
125 dementia will also greatly affect families and care partners who provide extensive hours of unpaid care<sup>5</sup>.  
126 Total health system and out-of-pocket costs for dementia care in Canada are currently estimated to be  
127 \$10 billion and the rising number of individuals living with dementia will have a substantial effect on  
128 health and social care systems<sup>4,5</sup>. Effective treatment options for dementia are limited, placing an  
129 emphasis on the importance of prevention<sup>1,5</sup>. The effectiveness of prevention strategies, however, is  
130 dependent on identifying and understanding potentially modifiable risk factors associated for dementia  
131 as well as their prevalence and distribution within a population<sup>5</sup>.

132 The 2020 report of the Lancet Commission on dementia prevention, intervention, and care  
133 identified 12 potentially modifiable risk factors<sup>6</sup>: less education, hearing loss, traumatic brain injury  
134 (TBI), hypertension, excessive alcohol consumption, obesity, smoking, depression, social isolation,  
135 physical inactivity, air pollution, and diabetes. They estimated that each risk factor accounted  
136 individually for between 2.0% to 22.0% of dementia cases and together accounted for 40% of dementia  
137 cases worldwide<sup>6</sup>. The distribution of modifiable risk factors for dementia has been examined  
138 in detail in other countries to inform national and regional public health strategy<sup>6-8</sup>. However, research

139 using national Canadian data has been lacking despite the importance of research on modifiable risk  
140 factors being highlighted in Canada's national dementia strategy<sup>9</sup>. In addition, while lower socio-  
141 economic status is associated with increased dementia incidence, little work has examined how the  
142 prevalence of modifiable risk factors for dementia varies by income<sup>10</sup>.

143 The objective of this study is to examine the prevalence and impact of potentially modifiable risk  
144 factors for dementia in Canada based on data from the Canadian Longitudinal Study on Aging (CLSA).  
145 Our specific aims are to estimate 1.) the prevalence of 12 potentially modifiable risk factors for all-cause  
146 dementia in the Canadian middle-aged and older adult population and 2.) the proportion of dementia  
147 cases attributable to each risk factor, i.e. the population attributable fraction (PAF), alone and in  
148 combination. Secondly, we will examine how the distribution of these risk factors varies by household  
149 income.

150

## 151 **Methods**

### 152 Setting and study type

153 We conducted a cross-sectional study of middle-aged and older adults in Canada.

### 154 Data Sources

155 The Canadian Longitudinal Study on Aging (CLSA) is a national, stratified sample of 51,338  
156 Canadian residents between the ages of 45 and 85 at baseline recruitment (2011-2015). Participants in  
157 CLSA were recruited via three sampling frames (the Canadian Community Health Survey, random-digit  
158 dialing, and provincial health registries). The CLSA is comprised of two cohorts, Tracking and  
159 Comprehensive. This study uses data only from the Comprehensive cohort as the calculation of all 12  
160 risk factors of interest is not possible on the Tracking cohort. Comprehensive cohort participants  
161 (n=30,097 at baseline) were randomly selected within proximity of 11 data collection sites in 7 provinces  
162 (Newfoundland and Labrador, Nova Scotia, Ontario, Quebec, Manitoba, Alberta, British Columbia) with

163 data collected in-person during home interviews and at the data collection sites. The methodology and  
164 sampling strategy of the CLSA has been fully described elsewhere<sup>11,12</sup>. Air quality data were collected  
165 and provided by the Canadian Urban Environmental Health Research Consortium and Health Canada  
166 and linked to participants by postal code and interview date<sup>13</sup>.

167

#### 168 Study participants

169 We included all Comprehensive cohort participants at baseline (2011-2015) and follow-up 1  
170 (2015-2018). At the time of recruitment CLSA participants had to be able to complete interviews in  
171 English or French and be able to participate in the study on their own. Residents of the three Canadian  
172 territories, First Nations reserves, or institutions; full-time members of the Canadian Armed Forces; and  
173 individuals unable to consent due to cognitive impairment were excluded from baseline recruitment.

174

#### 175 Participant characteristics

176 To characterize the study sample, we extracted self-reported data on demographics, income,  
177 number of chronic conditions, and general health. Income measures were based on total household  
178 income and categorized as implemented in the CLSA: less than \$20,000, \$20,000 - \$49,999, \$50,000 -  
179 \$99,999, \$100,000 - \$149,999 and \$150,000 or higher<sup>14</sup>.

180

#### 181 Modifiable risk factors for dementia

182 The definitions for the 12 modifiable risk factors associated with all-cause dementia were guided  
183 where possible by the 2020 Lancet Commission Report, other published work on modifiable risk factors  
184 for dementia, and the 2020 Canadian federal air quality guidelines<sup>6,7,15,16</sup>. The specific definitions for the  
185 risk factors are listed in Table 1. A comparison of these definitions with similar studies can be found in  
186 Supplemental Table S1. All definitions except for air quality, hearing loss, and obesity were defined using

187 CLSA self-report interview data. Air quality was based on national land-use regression models and  
188 satellite-derived measures<sup>17-21</sup>. Hearing loss was calculated using pure tone audiometry. Obesity was  
189 calculated using in-person BMI measurements. The relative risks associated with each risk factor were  
190 taken from the meta-analyses reported by the Lancet Commission<sup>6,22</sup>.

#### 191 Statistical Analysis

192 We constructed a descriptive profile of CLSA Comprehensive cohort participants at baseline,  
193 summarizing demographics, socioeconomic factors, and health status variables by measures of  
194 frequency, central tendency, and dispersion. In the primary analysis, the prevalence and 95% confidence  
195 interval of each modifiable risk factor was calculated with the use of sampling weights, which were  
196 designed to generalize to the target population of Canadian middle-aged and older adults. CLSA  
197 sampling weights were calibrated using age, sex, and education (within geographical regions)<sup>23</sup>. Within  
198 each calculation, individuals with missing data were removed on a per factor basis. For 10 of the risk  
199 factors, the proportion of missing values was minimal, ranging from 0% to 0.63%. Missingness was  
200 somewhat higher for physical inactivity (4.4%) and hearing loss (5.0%).

201 The crude PAF for each risk factor was estimated by Levin's formula<sup>24</sup>. Additionally, following  
202 the methodology introduced by Norton et al., we produced weighted PAFs to account for overlap  
203 between risk factors<sup>25</sup>. We generated communality weights by conducting principal component analysis  
204 on the tetrachoric correlation matrix of the 12 risk factors, extracting only components with eigenvalues  
205 > 1. The communality for each risk factor, which represents the degree to which it overlaps the other  
206 risk factors, was calculated as the sum of the squared factor loadings. The corresponding weight for  
207 each risk factor, representing the factor's uniqueness, was the complement of the communality.

208 We calculated two combined PAFs with different assumptions regarding the form of interactions  
209 between risk factors. The first is a widely-used method developed by Norton et al. that multiplicatively  
210 combines the individual communality-weighted PAFs<sup>6,7,25</sup>. This method was developed to yield more

211 plausible estimates of PAFs involving multiple risk factors than other methods that multiplicatively  
212 combined crude PAFs<sup>25,26</sup>. The second method of calculating a combined PAF assumes additive  
213 interactions between risk factors and has been suggested as an alternative to the communality-  
214 weighted multiplicative approach<sup>26</sup>. A technical appendix with all formulae can be found in  
215 Supplemental Table S2. We derived confidence intervals for all PAFs using a two-step bootstrapping  
216 approach to account for uncertainty in both the risk factor prevalence and relative risk estimate<sup>26</sup>. In this  
217 process we first generated 10,000 replicate samples with replacement and then within each replicate  
218 we parametrically sampled relative risks for each risk factor based on their reported confidence  
219 intervals.

220 We repeated all analyses within household income categories. We reported the prevalence  
221 and combined PAFs within each category of income and plotted the prevalence by income to facilitate  
222 comparison. Data were analyzed using the R programming language with the packages “survey” and  
223 “psych”<sup>27,28</sup>.

224

### 225 Sensitivity Analysis

226 We repeated the main analysis at the first follow-up data collection point in CLSA, which was  
227 approximately three years after baseline (2015-2018). To assess sensitivity to the use of sampling  
228 weights, we repeated all analysis using the crude prevalence for each risk factor. Finally, we also  
229 examined prevalence and PAF of each risk factor at baseline by sex.

### 230 Ethics

231 This study received ethics approval from the Hamilton Integrated Research Ethics Board (15408).

232

233

234



## 235 Results

236 The baseline CLSA Comprehensive cohort included 30,097 participants and was 50.9% female  
237 (Table 2) The median age was 62 years with first and third quartiles of 54 and 71 years. A small  
238 proportion of participants (8.1%) resided in rural areas. The participants were primarily white only  
239 (94.4%), followed by multiple identities (1.5%), South Asian only (0.9%) and Black only (0.7%). A small  
240 proportion (5.6%) of the sample reported an annual household income below \$20,000, 22.6% reported  
241 between \$20,000 and \$49,999, 35.2%, between \$50,000 and \$99,999, 19.6% between \$100,000 and  
242 \$149,999, and 17.0% reported an annual household income of \$150,000 or above. While nearly all  
243 participants (91.8%), reported having at least one chronic condition, over half (61.5%) of participants  
244 reported their general health to be “Excellent” or “Very Good” and only 1.3% reported that it was  
245 “Poor”.

### 246 Prevalence of risk factors

247 Using sample-weighted proportions, physical inactivity was the most prevalent risk factor  
248 (63.8%; 95% CI, 62.8% – 64.9%) followed by hypertension (32.8%; 31.7% – 33.8%), obesity (30.8%; 29.7%  
249 – 31.8%) and traumatic brain injury (23.9%; 22.9% – 24.8%) (Table 3). Smoking (9.6%; 8.9% – 10.3%),  
250 excessive alcohol consumption (11.4%; 10.8% - 12.0%), and hearing loss (15.7%; 14.9% – 16.5%) were  
251 the least common risk factors in the Canadian middle-aged and older adult population.

### 252 Populational attributable fractions

253 Physical inactivity (19.9%; 9.2%-29.6%), hypertension (16.6%, 4.9%-28.9%) and TBI (16.7%,  
254 11.4%-22.3%) had the highest crude PAFs (Table 3). Conversely, air pollution (1.7%; 1.3% -2.1%),  
255 excessive alcohol consumption (2.0%; 0.7-3.4%), and smoking (5.4%; 1.5%-10.3%), had the lowest crude  
256 PAFs. In the principal component analysis, we extracted five factors with eigenvalues > 1, representing  
257 60% of the total variation. The communality values for each risk factor varied from 42% to 82%.  
258 Accounting for overlap between risk factors, the weighted PAFs indicated that physical inactivity (11.6%;

259 5.4%-17.1%), depression (7.7%; 5.0%-10.7%), and hypertension (6.0%; 1.8%-10.4%) were associated  
260 with the most dementia cases while excessive alcohol consumption (0.4%; 0.1%-0.6%), air pollution  
261 (0.8%; 0.6%-1.0%), and smoking (2.1%; 0.6%-4.0%), were responsible for the fewest cases. The  
262 combined PAFs were 43.4% (37.4%-49.0%) by the weighted multiplicative method, and 60.9% (55.7%-  
263 65.5%) by the additive method.

264

#### 265 Variation in risk by income

266 The lowest income group exhibited the highest point prevalence for all risk factors except  
267 excessive alcohol consumption and hypertension (Figure 1; Table 4). There was a consistent gradient of  
268 decreasing prevalence and both PAFs (both crude and weighted) across increasing income categories for  
269 9 of the 12 risk factors: less education, hearing loss, obesity, smoking, depression, social isolation,  
270 physical inactivity, diabetes, and air pollution (Figure 1). Using the weighted multiplicative combined  
271 PAF, we estimate that the 12 risk factors accounted for 58.7% of dementia cases in the lowest income  
272 group but only 31.8% in the highest income group. The combined additive PAF was 71.3% in the lowest  
273 income group and 51.2% in the highest group (Table 4).

#### 274 Sensitivity Analysis

275 The risk factor prevalences and PAFs were broadly similar at follow-up 1 compared to baseline  
276 (Table 5). Air pollution dropped from 19.0% at baseline to 13.1% at follow-up 1. Physical inactivity was  
277 still the most prevalent risk factor with the highest crude and weighted PAFs. As with the baseline  
278 analysis, hypertension and TBI had the next highest crude PAFs, followed closely by obesity. The order of  
279 the weighted PAFs changed slightly in follow-up 1 compared to baseline as obesity had a higher  
280 weighted PAF than hypertension. The combined PAFs were similar between baseline and follow-up 1.

281 Avoiding the use of sampling weights noticeably lowered the prevalence estimates of low  
282 education, smoking, and air pollution (Table S3). However, the top three risk factors by prevalence and

283 PAF remained the same regardless of weighting, and the multiplicative weighted combined PAF (40.5%)  
284 and additive combined PAF (59.2%) were also similar. Analysis stratified by sex also yielded largely  
285 similar results (Table S4). Males had a higher prevalence of TBI (29.4% vs. 18.8%) and social isolation  
286 (20.2% vs. 15.1%) while females had a higher prevalence of depression (21.7% vs 15.1%).

## 287 **Discussion**

288 We examined the prevalence and population attributable fractions of 12 potentially modifiable  
289 risk factors for dementia in the Canadian middle-aged and older adult population using data from the  
290 Canadian Longitudinal Study on Aging. We found that the prevalence of risk factors varied between 9.6%  
291 and 63.8%, with physical inactivity the most prevalent risk factor and smoking the least prevalent.  
292 Depending on assumptions regarding the interaction of risk factors, we estimated that between 43.4%  
293 and 60.9% of dementia cases among Canadian middle-aged and older adults could be attributed to  
294 these 12 risk factors. Nine of the 12 risk factors demonstrated clear gradients across income categories,  
295 with higher prevalences of risk factors at lower incomes.

296 Our work employs a similar methodology to other global and regional studies<sup>6-8</sup>; however, a  
297 novel aspect of our work is that we were able to perform all calculations, except relative risk estimation,  
298 within a single national sample. We also used a bootstrapping approach to calculate confidence intervals  
299 for PAFs that account for variation in both the prevalence of risk factors and in the relative risks, an  
300 improvement over other studies that accounted only for variation within the relative risks<sup>7</sup> or did not  
301 calculate confidence intervals<sup>6</sup>. Despite using a similar methodology, the prevalence and PAFs produced  
302 in this study exhibit key differences from those in 2020 Lancet Commission report. While we found the  
303 risk factors responsible for the most dementia cases in Canada to be physical inactivity (wPAF=11.6%),  
304 depression (7.7%), and hypertension (6.0%), the Lancet Commission identified hearing loss (8.2%), less  
305 education (7.1%), and smoking (5.2%) as the most impactful risk factors. Differences in prevalence  
306 estimates, a result of different target populations and possibly in the definition of risk factors, are largely

307 responsible for the differences in the weighted PAFs. For example, physical inactivity had just a 11.0%  
308 prevalence in the Lancet Commission report, compared to 63.8% in our study and 62.8% in a similar  
309 study of adults in the United States<sup>7</sup>. Other Canadian research supports the high prevalence of physical  
310 inactivity we measured in this study<sup>29</sup>. The notable differences in individual PAFs between our study and  
311 other international and regional studies are meaningful as they indicate that there are important  
312 regional differences in risk factor distribution that can guide the composition and focus of national  
313 dementia strategies.

314 Despite the difference in individual PAFs, the combined PAFs we estimated were similar to those  
315 from studies conducted in other jurisdictions. The weighted multiplicative PAF for the 12 risk factors  
316 from our study (43%) was highly similar to that of Livingston<sup>22</sup> (40%) and Lee<sup>7</sup> (41%). Additionally, our  
317 additive combined PAF (61%) is similar to a global estimate (56%)<sup>26</sup>. The differences between the  
318 magnitude of the weighted multiplicative and additive combined PAFs are meaningful and ultimately  
319 rooted in strong assumptions of the form of interactivity of risk factors within individuals. Interactions  
320 between multiple risk factors for dementia is highly complex and the form of the interactions likely vary  
321 by each distinct set of risk factors present<sup>26,30,31</sup>. While we believe these combined PAF estimates are  
322 useful benchmarks, we have limited evidence on how multiple modifiable risk factors for dementia  
323 interact with each other and more research on dementia risk factor interaction could improve future  
324 estimation of their combined impact.

325 The results of this study can be used to inform dementia prevention strategies in Canada.  
326 Owing to its high prevalence, physical inactivity had the largest PAF, both crude and weighted.  
327 Depression had the second highest weighted PAF, a result of its high relative risk and relatively lower  
328 correlation with other risk factors. Depression and dementia have a complex and likely bidirectional  
329 relationship, but consensus is that depression is an independent risk factor for dementia that could be  
330 targeted for intervention<sup>32,33</sup>. Hypertension had the third highest weighted PAF, although this was

331 meaningfully different from obesity, which had a similar prevalence, relative risk, and communality as  
332 hypertension. TBI notably had one of the highest crude PAFs, but relatively lower weighted PAF due to a  
333 higher communality value. While our study highlights the risk factors with the greatest impact overall,  
334 effective prevention requires a combination of individually tailored and population-level interventions.  
335 Evidence supports the effectiveness of individualized, multi-domain interventions to reduce risk factors  
336 for dementia<sup>34</sup>. Yet many of the most impactful risk factors have structural etiologies which call for a  
337 population-level approach to address<sup>35</sup>.

338 Notably, we demonstrated gradients of increasing risk with decreasing income across 9 of the 12  
339 modifiable risk factors. This is concordant with observations of a higher incidence of dementia among  
340 lower income households and higher combined PAFs of risk factors in lower income countries<sup>36,37</sup>. The  
341 etiology of the relationship between socio-economic status and dementia risk is likely multifaceted and  
342 related to multiple behavioural, social, cultural, occupational, and environmental mechanisms. The  
343 consistently higher prevalence of dementia risk factors in lower income groups suggests that social-  
344 economic disparities in dementia incidence are unlikely to be resolved by a prevention focus on single  
345 factors. Policies to address the socio-economic disparities directly may be more effective. Future work  
346 should further investigate the relationship between socio-economic status and dementia, particularly  
347 the degree addressing material deprivation may reduce the prevalence of dementia risk factors and  
348 incidence of dementia.

#### 349 Limitations

350 Our study is primarily based on self-reported data, which while common in this field of research  
351 may introduce recall and social desirability biases. Compared to the target population, the  
352 Comprehensive CLSA cohort was whiter, healthier, and wealthier<sup>11</sup>. However, our use of sampling  
353 weights calibrated by education partially addresses this limitation. Individuals with cognitive impairment  
354 significant enough to prevent them from giving informed consent were excluded from the CLSA at

355 baseline, and this may have resulted in underestimation of the prevalence of some risk factors. With  
356 respect to the PAF calculations, the relative risks used were calculated from an international systematic  
357 review and are not specific to Canada. While we strove to align our risk factor definitions with previous  
358 work, the Lancet Commission report from which the relative risk were taken used data from multiple  
359 sources and did not always have a single, specific definition.

360

### 361 **Conclusion**

362 We examined the prevalence and population attributable fractions of 12 potentially modifiable  
363 risk factors for dementia and estimated that they accounted for between 43.3% and 60.9% of dementia  
364 cases among middle-aged and older adults in Canada. Accounting for overlap between risk factors, the  
365 factors with the highest overall impact on dementia cases were physical inactivity, depression, and  
366 hypertension. The differences in the impact of individual risk factors observed between this study and  
367 other international and regional studies highlight the importance of tailoring national and regional  
368 dementia strategies to the local distribution of risk factors.

369

370

371

372

373

374

375

376

377

378

379  
380  
381  
382  
383  
384  
385  
386  
387  
388  
389  
390  
391  
392  
393  
394  
395  
396  
397  
398  
399  
400  
401  
402

## **Acknowledgements**

This research was made possible using the data/biospecimens collected by the Canadian Longitudinal Study on Aging (CLSA). Funding for the CLSA is provided by the Government of Canada through the Canadian Institutes of Health Research under grant reference: LSA 94473 and the Canada Foundation for Innovation, as well as the following provinces, Newfoundland, Nova Scotia, Quebec, Ontario, Manitoba, Alberta, and British Columbia. This research has been conducted using the CLSA dataset Baseline Comprehensive Version 7, under Application Number 22SP004. The CLSA is led by Drs Parminder Raina, Christina Wolfson, and Susan Kirkland. The opinions expressed in this manuscript are the author's own and do not reflect the views of the CLSA. SO2 and PM2.5 metrics indexed to DMTI Spatial Inc. postal codes, were provided by CANUE (Canadian Urban Environmental Health Research Consortium). PR holds the Raymond and Margaret Labarge Chair in Optimal Aging and Knowledge Application for Optimal Aging, is the Director of the McMaster Institute for Research on Aging and the Labarge Centre for Mobility in Aging and holds a Tier 1 Canada Research Chair in Geroscience. LG is supported by the McLaughlin Foundation Professorship in Population and Public Health. TLA holds a Tier 1 Canada Research Chair in Healthy Aging.

403

404

## 405 References

- 406 1. World Health Organization. Dementia fact sheet, [https://www.who.int/news-room/fact-](https://www.who.int/news-room/fact-sheets/detail/dementia)  
407 [sheets/detail/dementia](https://www.who.int/news-room/fact-sheets/detail/dementia) (accessed 1 February 2023).
- 408 2. Association AP. *Diagnostic and Statistical Manual of Mental Disorders: DSM-5-TR*. American  
409 Psychiatric Association Publishing, 2022.
- 410 3. Patterson C. *World Alzheimer report 2018*. Report, Alzheimer’s Disease International,  
411 <https://apo.org.au/node/260056> (21 September 2018, accessed 30 November 2022).
- 412 4. What is dementia? Alzheimer Society of Canada, [http://alzheimer.ca/en/about-dementia/what-](http://alzheimer.ca/en/about-dementia/what-dementia)  
413 [dementia](http://alzheimer.ca/en/about-dementia/what-dementia) (accessed 28 August 2023).
- 414 5. Navigating the Path Forward for Dementia in Canada: The Landmark Study Report #1. Alzheimer  
415 Society of Canada, [http://alzheimer.ca/en/research/reports-dementia/landmark-study-report-1-](http://alzheimer.ca/en/research/reports-dementia/landmark-study-report-1-path-forward)  
416 [path-forward](http://alzheimer.ca/en/research/reports-dementia/landmark-study-report-1-path-forward) (accessed 30 November 2022).
- 417 6. Livingston G, Huntley J, Sommerlad A, et al. Dementia prevention, intervention, and care: 2020  
418 report of the Lancet Commission. *The Lancet* 2020; 396: 413–446.
- 419 7. Lee M, Whitsel E, Avery C, et al. Variation in Population Attributable Fraction of Dementia  
420 Associated With Potentially Modifiable Risk Factors by Race and Ethnicity in the US. *JAMA Network*  
421 *Open* 2022; 5: e2219672.
- 422 8. Vergara RC, Zitko P, Slachevsky A, et al. Population attributable fraction of modifiable risk factors for  
423 dementia in Chile. *Alzheimers Dement (Amst)* 2022; 14: e12273.
- 424 9. Public Health Agency of. *A Dementia Strategy for Canada: Together We Aspire*. Ottawa, Canada,  
425 [https://www.canada.ca/en/public-health/services/publications/diseases-conditions/dementia-](https://www.canada.ca/en/public-health/services/publications/diseases-conditions/dementia-strategy.html)  
426 [strategy.html](https://www.canada.ca/en/public-health/services/publications/diseases-conditions/dementia-strategy.html) (June 2019, accessed 30 November 2022).
- 427 10. Cutler DM, Lleras-Muney A, Vogl T. Socioeconomic Status and Health: Dimensions and Mechanisms.  
428 Epub ahead of print September 2008. DOI: 10.3386/w14333.
- 429 11. Raina P, Wolfson C, Kirkland S, et al. Cohort Profile: The Canadian Longitudinal Study on Aging  
430 (CLSA). *International Journal of Epidemiology* 2019; 48: 1752–1753j.
- 431 12. Raina PS, Wolfson C, Kirkland SA, et al. The Canadian Longitudinal Study on Aging (CLSA)\*. *Canadian*  
432 *Journal on Aging / La Revue canadienne du vieillissement* 2009; 28: 221–229.
- 433 13. Welcome to CANUE. CANUE, <https://canue.ca/> (2023, accessed 28 August 2023).
- 434 14. Data Support Documentation | Canadian Longitudinal Study on Aging, [https://www.clsa-](https://www.clsa-elcv.ca/researchers/data-support-documentation)  
435 [elcv.ca/researchers/data-support-documentation](https://www.clsa-elcv.ca/researchers/data-support-documentation) (accessed 5 April 2024).



- 436 15. Canada E and CC. Population exposure to outdoor air pollutants,  
437 [https://www.canada.ca/en/environment-climate-change/services/environmental-  
indicators/population-exposure-outdoor-air-pollutants.html](https://www.canada.ca/en/environment-climate-change/services/environmental-<br/>438 indicators/population-exposure-outdoor-air-pollutants.html) (2021, accessed 1 December 2022).
- 439 16. Government of Canada SC. Social isolation and mortality among Canadian seniors,  
440 <https://www150.statcan.gc.ca/n1/pub/82-003-x/2020003/article/00003-eng.htm> (2020, accessed  
441 28 August 2023).
- 442 17. Hystad P, Setton E, Cervantes A, et al. Creating National Air Pollution Models for Population  
443 Exposure Assessment in Canada. *Environ Health Perspect* 2011; 119: 1123–1129.
- 444 18. Boys BL, Martin RV, van Donkelaar A, et al. Fifteen-Year Global Time Series of Satellite-Derived Fine  
445 Particulate Matter. *Environ Sci Technol* 2014; 48: 11109–11118.
- 446 19. van Donkelaar A, Martin RV, Li C, et al. Regional Estimates of Chemical Composition of Fine  
447 Particulate Matter Using a Combined Geoscience-Statistical Method with Information from  
448 Satellites, Models, and Monitors. *Environ Sci Technol* 2019; 53: 2595–2611.
- 449 20. Kharol SK, McLinden CA, Sioris CE, et al. OMI satellite observations of decadal changes in ground-  
450 level sulfur dioxide over North America. *Atmospheric Chemistry and Physics* 2017; 17: 5921–5929.
- 451 21. McLinden CA, Fioletov V, Boersma KF, et al. Improved satellite retrievals of NO<sub>2</sub> and SO<sub>2</sub> over the  
452 Canadian oil sands and comparisons with surface measurements. *Atmospheric Chemistry and  
453 Physics* 2014; 14: 3637–3656.
- 454 22. Livingston G, Sommerlad A, Orgeta V, et al. Dementia prevention, intervention, and care. *The Lancet*  
455 2017; 390: 2673–2734.
- 456 23. CSLA. *CLSA TECHNICAL DOCUMENT 2023- Sampling and Computation of Response Rates and Sample  
457 Weights for the Tracking (Telephone Interview) Participants and Comprehensive Participants*,  
458 <https://www.clsa-elcv.ca/doc/5130> (February 2023, accessed 5 April 2024).
- 459 24. Levin ML. The occurrence of lung cancer in man. *Acta Unio Int Contra Cancrum* 1953; 9: 531–541.
- 460 25. Norton S, Matthews FE, Barnes DE, et al. Potential for primary prevention of Alzheimer’s disease: an  
461 analysis of population-based data. *The Lancet Neurology* 2014; 13: 788–794.
- 462 26. Welberry HJ, Tisdell CC, Huque MdH, et al. Have We Been Underestimating Modifiable Dementia  
463 Risk? An Alternative Approach for Calculating the Combined Population Attributable Fraction for  
464 Modifiable Dementia Risk Factors. *American Journal of Epidemiology* 2023; 192: 1763–1771.
- 465 27. Revelle W. *psych: Procedures for Psychological, Psychometric, and Personality Research*,  
466 <https://cran.r-project.org/web/packages/psych/index.html> (2024, accessed 5 April 2024).
- 467 28. Lumley T. *survey: Analysis of Complex Survey Samples*, [https://cran.r-  
project.org/web/packages/survey/index.html](https://cran.r-<br/>468 project.org/web/packages/survey/index.html) (2023, accessed 28 August 2023).

469 29. Government of Canada SC. Intersecting risk factors for physical inactivity among Canadian adults,  
470 <https://www150.statcan.gc.ca/n1/pub/82-003-x/2023011/article/00002-eng.htm> (2023, accessed 5  
471 April 2024).

472 30. O’Donoghue J, Roantree M, McCarren A. Variable interactions in risk factors for dementia. In: *2016*  
473 *IEEE Tenth International Conference on Research Challenges in Information Science (RCIS)*, pp. 1–10.

474 31. Li R, Li R, Xie J, et al. Associations of socioeconomic status and healthy lifestyle with incident early-  
475 onset and late-onset dementia: a prospective cohort study. *The Lancet Healthy Longevity* 2023; 4:  
476 e693–e702.

477 32. Bellou V, Belbasis L, Tzoulaki I, et al. Systematic evaluation of the associations between  
478 environmental risk factors and dementia: An umbrella review of systematic reviews and meta-  
479 analyses. *Alzheimer’s & Dementia* 2017; 13: 406–418.

480 33. Deckers K, van Boxtel MPJ, Schiepers OJG, et al. Target risk factors for dementia prevention: a  
481 systematic review and Delphi consensus study on the evidence from observational studies.  
482 *International Journal of Geriatric Psychiatry* 2015; 30: 234–246.

483 34. Isaacson RS, Hristov H, Saif N, et al. Individualized clinical management of patients at risk for  
484 Alzheimer’s dementia. *Alzheimers Dement* 2019; 15: 1588–1602.

485 35. Walsh S, Govia I, Peters R, et al. What would a population-level approach to dementia risk reduction  
486 look like, and how would it work? *Alzheimers Dement* 2023; 19: 3203–3209.

487 36. Korhonen K, Einiö E, Leinonen T, et al. Midlife socioeconomic position and old-age dementia  
488 mortality: a large prospective register-based study from Finland. *BMJ Open* 2020; 10: e033234.

489 37. Suemoto CK, Mukadam N, Brucki SMD, et al. Risk factors for dementia in Brazil: Differences by  
490 region and race. *Alzheimer’s & Dementia* 2023; 19: 1849–1857.

491

492

493

494

495

496

497

498

499

500

501

502 **Table 1.** Definitions of potentially modifiable risk factors for dementia

503

| <b>Risk Factor</b>            | <b>Definition</b>                                                                                                                                                                                                                                                                               |
|-------------------------------|-------------------------------------------------------------------------------------------------------------------------------------------------------------------------------------------------------------------------------------------------------------------------------------------------|
| Less Education                | Less than secondary school graduation                                                                                                                                                                                                                                                           |
| Hearing Loss                  | Pure-tone audiometry: Average loss in better ear > 25 dB measured at 0.5, 1, 2, and 4 kHz                                                                                                                                                                                                       |
| Traumatic Brain Injury        | Lifetime history of head injury resulting in loss of consciousness, loss of memory, or dazedness                                                                                                                                                                                                |
| Hypertension                  | Self-reported medical diagnosis of high blood pressure or hypertension                                                                                                                                                                                                                          |
| Excessive alcohol consumption | Self-reported frequency of drinking more than 15 alcoholic drinks for males and 10 for females per week in the past 12 months                                                                                                                                                                   |
| Obesity                       | Measured body mass index (BMI) $\geq 30$ kg/m <sup>2</sup>                                                                                                                                                                                                                                      |
| Smoking                       | Self-reported current smoking (at least one cigarette every day for the past 30 days)                                                                                                                                                                                                           |
| Depression                    | CESD-10 score $\geq 10$                                                                                                                                                                                                                                                                         |
| Physical inactivity           | Self-reported physical activity of less than 75 minutes of vigorous activity or less than 150 minutes of combined moderate and vigorous activity per week                                                                                                                                       |
| Diabetes                      | Self-reported medical diagnosis of diabetes, borderline diabetes, or high blood sugar                                                                                                                                                                                                           |
| Social isolation              | Self-reported frequency of participation in family/friend activities outside of household, religious activities, physical activities with other, educational/cultural activities, association activities, volunteer/charity work, and other recreational activities all less than once per week |
| Air pollution                 | Nitrogen dioxide (NO <sub>2</sub> ): Annual average $\geq 17$ ppb <i>or</i><br>Fine particle matter (PM <sub>2.5</sub> ): 3-year annual average $\geq 8.8$ $\mu\text{g}/\text{m}^3$ <i>or</i><br>Sulfur dioxide (SO <sub>2</sub> ): 3-year annual average $\geq 5$ ppb                          |

504

505

506

507

508

509

510

511  
512  
513  
514  
515  
516

**Table 2:** Characteristics of CLSA Comprehensive cohort at baseline

| Characteristic                 | CLSA Comprehensive Cohort<br>(n=30,097) |
|--------------------------------|-----------------------------------------|
| <b>Sociodemographic</b>        |                                         |
| Sex, Female                    | 15,320 (50.9%)                          |
| Age, yrs., median (Q1, Q3)     | 62 (54, 71)                             |
| Age, yrs.                      |                                         |
| 45-54                          | 7595 (25.2%)                            |
| 55-64                          | 9856 (32.7%)                            |
| 65-75                          | 7362 (24.5%)                            |
| 75+                            | 5284 (17.6%)                            |
| Rural resident                 | 2424 (8.1%)                             |
| Cultural / Racial Background   |                                         |
| White only                     | 28,372 (94.4%)                          |
| Black only                     | 221 (0.7%)                              |
| Chinese only                   | 212 (0.7%)                              |
| South Asian only               | 271 (0.9%)                              |
| Multiple                       | 447 (1.5%)                              |
| Other                          | 544 (1.8%)                              |
| Total household Income (CAD)   |                                         |
| <\$19,999                      | 1566 (5.6%)                             |
| \$20,000 - \$49,999            | 6360 (22.6%)                            |
| \$50,000 - \$99,999            | 9907 (35.2%)                            |
| \$100,000 - \$149,999          | 5524 (19.6%)                            |
| >\$150,000                     | 4799 (17.0%)                            |
| <b>Health Status</b>           |                                         |
| At least one chronic condition | 27,633 (91.8%)                          |
| Self-rated general health      |                                         |
| Excellent                      | 5995 (19.9%)                            |
| Very good                      | 12,420 (41.3%)                          |
| Good                           | 8877 (29.5%)                            |
| Fair                           | 2315 (7.7%)                             |
| Poor                           | 467 (1.6%)                              |
| Self-rated healthy aging       |                                         |
| Excellent                      | 5579 (18.6%)                            |
| Very good                      | 12,899 (42.9%)                          |
| Good                           | 9023 (30.0%)                            |
| Fair                           | 2137 (7.1%)                             |
| Poor                           | 398 (1.3%)                              |

517

518

519 **Table 3.** The weighted prevalence, relative risk, communality, and population attributable fractions

520 (PAF) of dementia risk factors in the CLSA comprehensive cohort at baseline (2011-2015, n=30,097)

521

| Risk Factor                      | Prevalence, %<br>(95% CI) | Relative risk<br>(95% CI) | Communality<br>% | Crude, PAF,<br>%  | Weighted, PAF,<br>% |
|----------------------------------|---------------------------|---------------------------|------------------|-------------------|---------------------|
| Less Education                   | 17.4 (16.1 – 18.6)        | 1.59 (1.26 – 2.01)        | 54               | 9.3 (4.3, 15.0)   | 4.3 (2.0, 6.9)      |
| Hearing Loss                     | 15.7 (14.9 – 16.5)        | 1.94 (1.38 – 2.73)        | 74               | 12.9 (5.7, 21.5)  | 3.3 (1.5, 5.6)      |
| TBI                              | 23.9 (22.9 – 24.8)        | 1.84 (1.54 – 2.20)        | 71               | 16.7 (11.4, 22.3) | 4.8 (3.3, 6.5)      |
| Hypertension                     | 32.8 (31.7 – 33.8)        | 1.61 (1.16 – 2.24)        | 64               | 16.6 (4.9, 28.9)  | 6.0 (1.8, 10.4)     |
| Excessive Alcohol<br>Consumption | 11.4 (10.8 – 12.0)        | 1.18 (1.06 – 1.31)        | 82               | 2.0 (0.7, 3.4)    | 0.4 (0.1, 0.6)      |
| Obesity                          | 30.8 (29.7 – 31.8)        | 1.60 (1.34 – 1.92)        | 64               | 15.6 (9.4, 22.1)  | 5.6 (3.4, 8.0)      |
| Smoking                          | 9.6 (8.9 – 10.3)          | 1.59 (1.15 – 2.20)        | 61               | 5.4 (1.5, 10.3)   | 2.1 (0.6, 4.0)      |
| Depression                       | 18.5 (17.6 – 19.4)        | 1.90 (1.55 – 2.33)        | 46               | 14.3 (9.3, 19.8)  | 7.7 (5.0, 10.7)     |
| Social Isolation                 | 17.5 (16.6 – 18.5)        | 1.57 (1.32 – 1.85)        | 48               | 9.1 (5.4, 13.0)   | 4.7 (2.8, 6.8)      |
| Physical Inactivity              | 63.8 (62.8 – 64.9)        | 1.39 (1.16 – 1.67)        | 42               | 19.9 (9.2, 29.6)  | 11.6 (5.4, 17.1)    |
| Diabetes                         | 17.4 (16.5 – 18.2)        | 1.54 (1.33 – 1.79)        | 59               | 8.6 (5.4, 12.1)   | 3.5 (2.2, 4.9)      |
| Air Pollution                    | 19.0 (18.0 – 20.0)        | 1.09 (1.07 – 1.11)        | 52               | 1.7 (1.3, 2.1)    | 0.8 (0.6, 1.0)      |
| <b>Combined Factors</b>          | <b>Combined PAF, %</b>    |                           |                  |                   |                     |
| Weighted<br>Multiplicative       | 43.4 (37.3, 49.0)         |                           |                  |                   |                     |
| Additive                         | 60.9 (55.7, 65.5)         |                           |                  |                   |                     |

522

523

524

525

526

527

528

529

530

531

532

533

534

535

536

537

538

539

540

541  
542  
543  
544  
545

**Table 4.** The weighted prevalence and combined population attributable fractions (PAFs) for dementia risk factors by income group in CLSA the comprehensive cohort at baseline

| Household income              | <\$20,000     | \$20,000 - <\$50,000 | \$50,000 - <\$100,000 | \$100,000 - <\$150,000 | >\$150,000    |
|-------------------------------|---------------|----------------------|-----------------------|------------------------|---------------|
| Risk Factor                   | Prevalence, % | Prevalence, %        | Prevalence, %         | Prevalence, %          | Prevalence, % |
| Less Education                | 47.3          | 32.6                 | 13.3                  | 7.2                    | 3.4           |
| Hearing Loss                  | 26.1          | 25.8                 | 15.5                  | 8.4                    | 6.0           |
| TBI                           | 27.7          | 19.2                 | 23.7                  | 25.2                   | 27.7          |
| Hypertension                  | 39.6          | 41.5                 | 32.7                  | 26.6                   | 23.9          |
| Excessive Alcohol Consumption | 7.0           | 10.4                 | 11.3                  | 12.2                   | 14.8          |
| Obesity                       | 42.2          | 33.5                 | 31.8                  | 28.1                   | 23.9          |
| Smoking                       | 23.6          | 13.5                 | 8.8                   | 7.7                    | 3.5           |
| Depression                    | 48.3          | 23.5                 | 16.7                  | 11.7                   | 8.7           |
| Social Isolation              | 26.9          | 21.1                 | 17.4                  | 15.9                   | 12.2          |
| Physical Inactivity           | 79.5          | 74.2                 | 64.0                  | 57.5                   | 48.1          |
| Diabetes                      | 28.6          | 21.9                 | 17.3                  | 13.5                   | 10.2          |
| Air Pollution                 | 37.8          | 27.4                 | 17.9                  | 12.6                   | 12.0          |
| <b>Combined Factors</b>       |               |                      |                       |                        |               |
| Weighted Multiplicative       | 58.7          | 50.0                 | 42.2                  | 36.8                   | 31.8          |
| Additive                      | 71.3          | 65.7                 | 59.9                  | 55.3                   | 51.2          |

546  
547  
548  
549  
550  
551  
552  
553  
554  
555  
556  
557  
558  
559  
560  
561  
562  
563  
564

565  
566  
567  
568

**Table 5.** The weighted prevalence, relative risk, communality, and population attributable fractions (PAF) of dementia risk factors in the CLSA comprehensive cohort at follow-up 1 (2015-2018, n=27,768)

| <b>Risk Factor</b>            | <b>Prevalence, % (95% CI)</b> | <b>Relative risk, (95% CI)</b> | <b>Communality %</b> | <b>Crude PAF, %</b> | <b>Weighted PAF, %</b> |
|-------------------------------|-------------------------------|--------------------------------|----------------------|---------------------|------------------------|
| Less Education                | 16.0 (14.7, 17.3)             | 1.59 (1.26 – 2.01)             | 60                   | 8.6 (4.0, 13.9)     | 3.4 (1.6, 5.6)         |
| Hearing Loss                  | 16.2 (15.4, 17.1)             | 1.94 (1.38 – 2.73)             | 72                   | 13.2 (5.7, 21.7)    | 3.7 (1.6, 6.1)         |
| TBI                           | 24.4 (23.4, 25.5)             | 1.84 (1.54 – 2.20)             | 80                   | 17.0 (11.7, 22.6)   | 3.4 (2.3, 4.5)         |
| Hypertension                  | 34.7 (33.7, 35.8)             | 1.61 (1.16 – 2.24)             | 66                   | 17.5 (5.0, 30.0)    | 5.9 (1.7, 10.2)        |
| Excessive Alcohol Consumption | 11.4 (10.8, 12.1)             | 1.18 (1.06 – 1.31)             | 75                   | 2.0 (0.7, 3.5)      | 0.5 (0.2, 0.9)         |
| Obesity                       | 31.3 (30.2, 32.5)             | 1.60 (1.34 – 1.92)             | 57                   | 15.8 (9.5, 22.3)    | 6.8 (4.1, 9.6)         |
| Smoking                       | 7.7 (7.1, 8.5)                | 1.59 (1.15 – 2.20)             | 61                   | 4.4 (1.0, 8.5)      | 1.7 (0.4, 3.3)         |
| Depression                    | 16.0 (15.1, 17.0)             | 1.90 (1.55 – 2.33)             | 45                   | 12.6 (8.0, 17.5)    | 6.9 (4.4, 9.6)         |
| Social Isolation              | 17.7 (16.7, 18.7)             | 1.57 (1.32 – 1.85)             | 57                   | 9.2 (5.5, 13.2)     | 3.9 (2.4, 5.7)         |
| Physical Inactivity           | 63.7 (62.6, 64.8)             | 1.39 (1.16 – 1.67)             | 57                   | 19.8 (9.1, 30.0)    | 8.5 (3.9, 12.9)        |
| Diabetes                      | 19.4 (18.6, 20.4)             | 1.54 (1.33 – 1.79)             | 59                   | 9.5 (6.0, 13.3)     | 3.9 (2.4, 5.5)         |
| Air Pollution                 | 13.1 (12.1, 14.1)             | 1.09 (1.07 – 1.11)             | 31                   | 1.2 (0.9, 1.4)      | 0.8 (0.6, 1.0)         |
| <b>Combined Factors</b>       | <b>Combined PAF</b>           |                                |                      |                     |                        |
| Weighted Multiplicative       | 40.1 (34.5, 45.2)             |                                |                      |                     |                        |
| Additive                      | 60.8 (55.5, 65.4)             |                                |                      |                     |                        |

569  
570  
571  
572  
573  
574  
575  
576  
577  
578  
579  
580  
581  
582  
583  
584  
585  
586  
587  
588  
589  
590  
591

592 **Figure 1.** Weighted prevalence of dementia risk factors by household income in CLSA comprehensive  
593 cohort at baseline

594

595

596

597

598

599

600

601

602

603

604

605

606

607



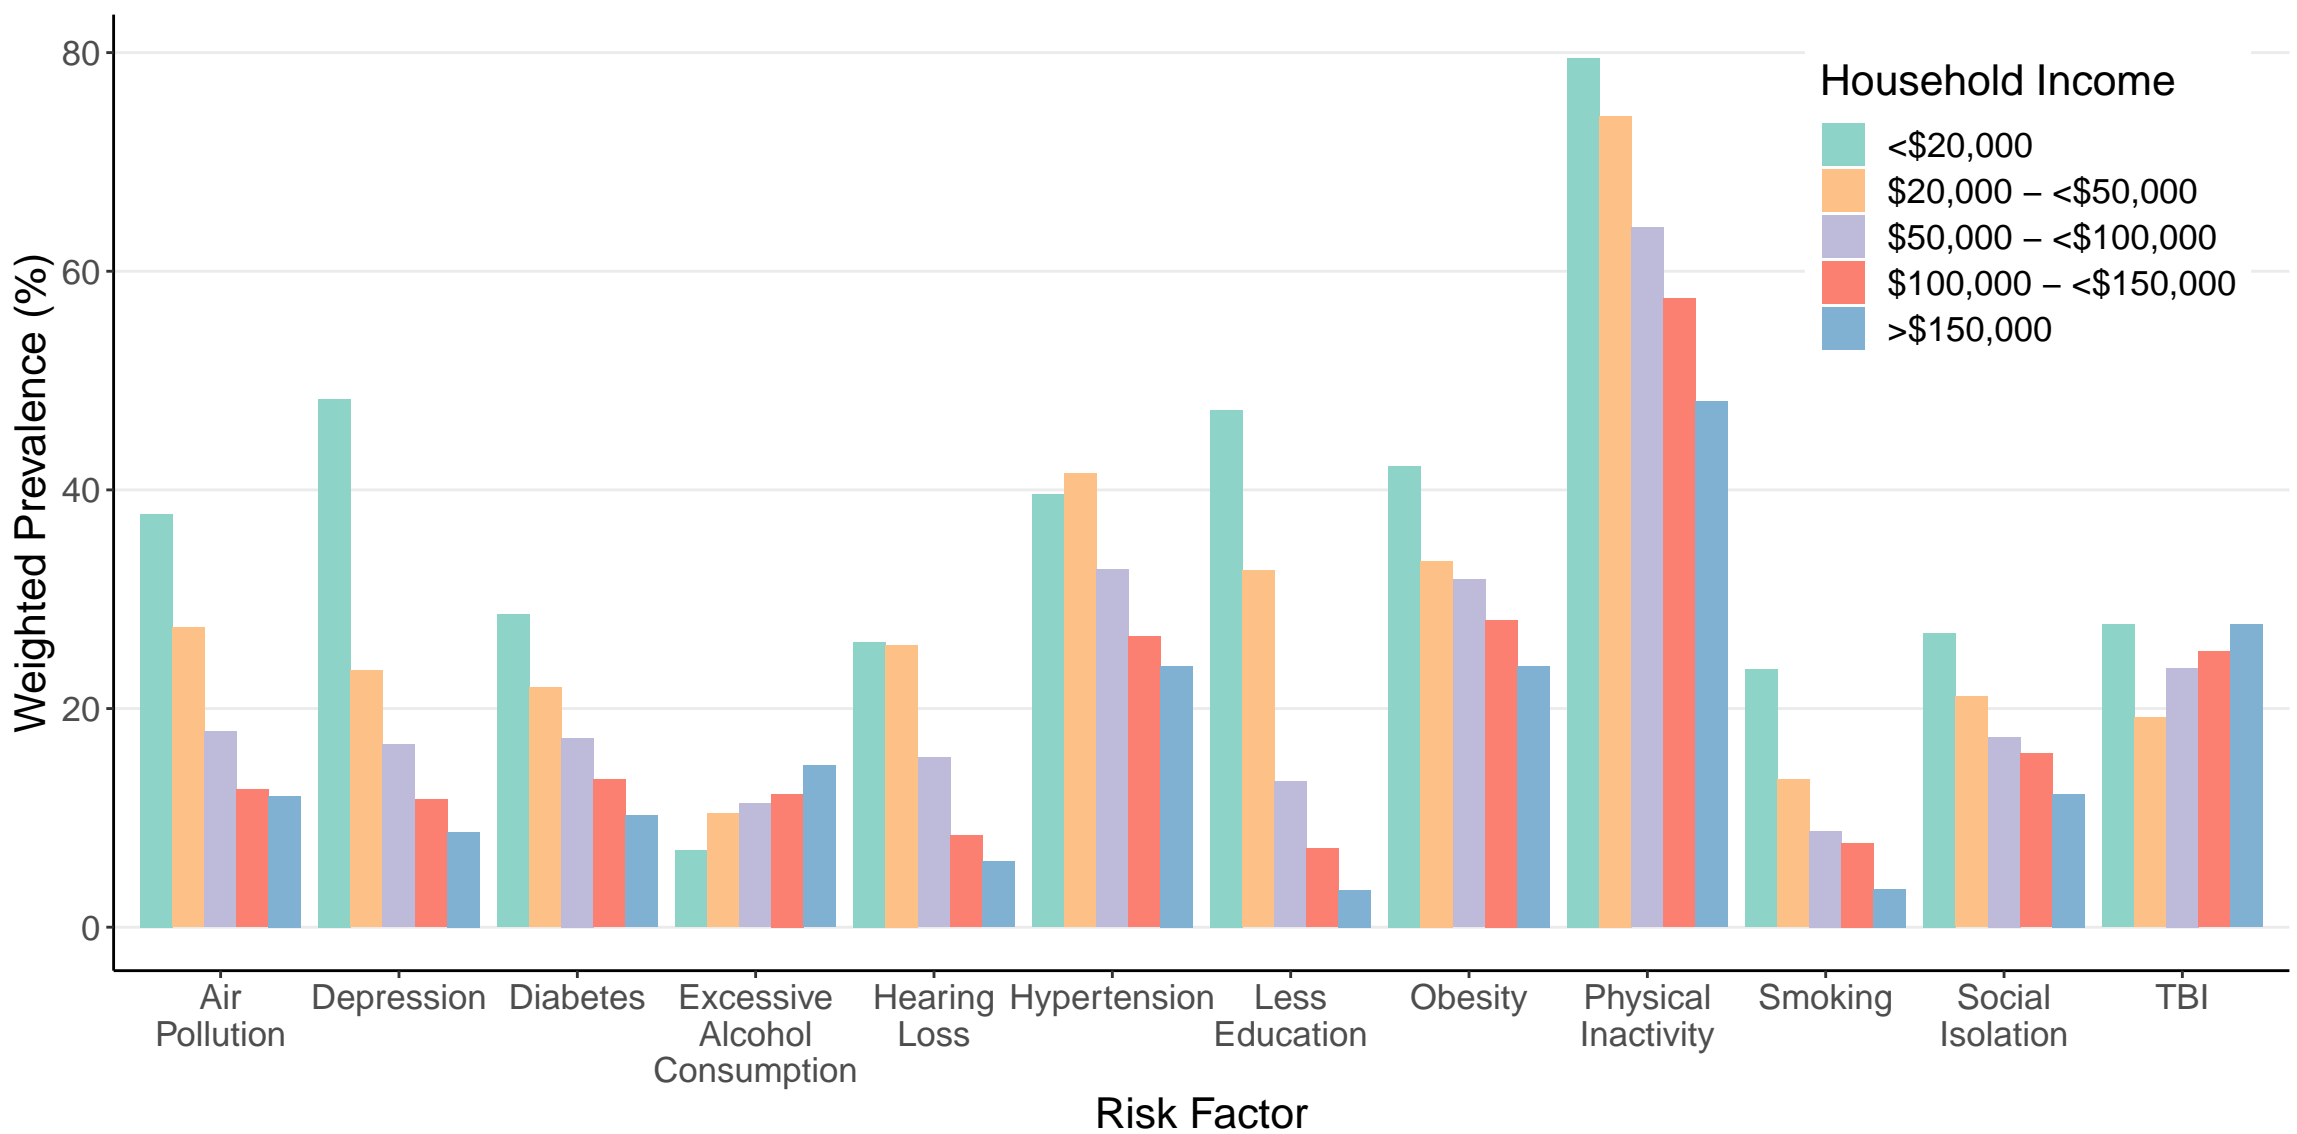

Source: https://medrxiv.org/content/10.1101/2024.04.06.24305404.full.pdf
